# Supplementary material for: Guest water-induced structural transformation and spin-crossover variation of a two-dimensional Hofmann-type compound
Source: Royal Society of Chemistry journal article supplement (doi:10.1039/d4dt00435c), 2024-01-01
Supplement: d4dt00435c1.pdf [file d4dt00435c1.pdf]

## **Guest water-induced structural transformation and spin-crossover variation of a two-dimensional Hofmann-type compound**

Zhi-Kun Liu,<sup>a†</sup> Ke Sun,<sup>a†</sup> Jin-Peng Xue,<sup>a</sup> Zi-Shuo Yao,<sup>a\*</sup> Jun Tao<sup>a\*</sup>

*<sup>a</sup>Key Laboratory of Cluster Science of Ministry of Education, School of Chemistry and  
Chemical Engineering, Liangxiang Campus, Beijing Institute of Technology, Beijing 102488,  
People's Republic of China.*

*†These authors contributed equally to this work.*

E-mail: taojun@bit.edu.cn; zishuoyao@bit.edu.cn

## Table of Contents

|                                                                                                                                        |    |
|----------------------------------------------------------------------------------------------------------------------------------------|----|
| 1. Materials and methods .....                                                                                                         | 3  |
| 2. Synthesis .....                                                                                                                     | 4  |
| 3. Additional Tables.....                                                                                                              | 5  |
| Table S1. Crystal structure and refinement details for compound <b>1·H<sub>2</sub>O</b> .....                                          | 5  |
| Table S2. Crystal structure and refinement details for compound <b>1</b> .....                                                         | 6  |
| Table S3. The Fe–N bond lengths in compounds <b>1·H<sub>2</sub>O</b> and <b>1</b> .....                                                | 7  |
| Table S4. The $\pi\cdots\pi$ , hydrogen-bonding interaction distances and Fe $\cdots$ Fe distances .....                               | 7  |
| 4. Additional Figures .....                                                                                                            | 8  |
| Fig. S1 PXRD patterns of compounds <b>1·H<sub>2</sub>O</b> and <b>1</b> .....                                                          | 8  |
| Fig. S2 TGA curves of <b>1·H<sub>2</sub>O</b> and <b>1</b> .....                                                                       | 8  |
| Fig. S3 HS fraction ( $\chi_{HS}$ ) and normalized $\partial(\chi_M^T)$ versus $T$ plots of <b>1·H<sub>2</sub>O</b> and <b>1</b> ..... | 9  |
| Fig. S4 DSC curves of <b>1·H<sub>2</sub>O</b> and <b>1</b> upon cooling and warming. ....                                              | 9  |
| Fig. S5 Adjacent layers showing interlayer ligand $\pi\cdots\pi$ interactions for <b>1·H<sub>2</sub>O</b> and <b>1</b> .....           | 9  |
| Fig. S6 The asymmetric unit of compound <b>1</b> , and 3D Stacked Layers.....                                                          | 10 |
| Fig. S7 FT-IR spectra of <b>1·H<sub>2</sub>O</b> and <b>1</b> .....                                                                    | 10 |
| Fig. S8 The Fe $\cdots$ Fe distances in the 2D [FePt(CN) <sub>4</sub> ] <sub>n</sub> layer. ....                                       | 10 |
| Fig. S9 The asymmetric unit of compound <b>1·H<sub>2</sub>O</b> .....                                                                  | 11 |
| Fig. S10 The asymmetric unit of compound <b>1</b> .....                                                                                | 11 |
| 5 References.....                                                                                                                      | 11 |

## 1. Materials and methods

All reagents and materials were purchased commercially and were used without further purification.

The C, H and N elemental analyses were performed on a EUROVECTER EA3000 analyzer. Powder X-ray diffraction (PXRD) data were recorded on a Bruker D8 Advance Diffractometer with Cu K $\alpha$  radiation ( $\lambda = 1.54056 \text{ \AA}$ ). IR spectra were recorded in the range of 4000–400  $\text{cm}^{-1}$  on a Thermo IS5 spectrometer with KBr pellets. Differential scanning calorimetry (DSC) measurements were conducted in an aluminum closed pan on a PerkinElmer DSC 8000. Thermogravimetric (TG) analyses were performed under a nitrogen atmosphere on a TG-DTA 6200 instrument with a heating rate of 10  $^{\circ}\text{C min}^{-1}$ .

### Magnetic measurements

Magnetic susceptibilities were determined on a Quantum Design MPMS XL7 magnetometer with a scan rate of 2 K  $\text{min}^{-1}$ . A field of 5000 Oe was applied in the measured temperature range. Magnetic data were corrected for the sample holder and diamagnetic contributions.

### Single-crystal X-ray crystallography

Single-crystal X-ray diffraction (SCXRD) data were collected using a Rigaku Oxford XtaLAB PRO diffractometer with graphite-monochromated Mo K $\alpha$  radiation ( $\lambda = 0.71073 \text{ \AA}$ ). The structure was solved by direct methods and further refined by full-matrix least-squares techniques on  $F^2$  with SHELXL.<sup>1</sup> Non-hydrogen atoms were refined anisotropically, and the hydrogen atoms were generated geometrically and refined isotropically. The ligand locates in special positions of mirror symmetry, we have used Olex2<sup>2</sup> to refine the disordered ligands. For **1**·H<sub>2</sub>O, in these heavy-atom structures as it was not possible to see clear electron-density peaks in difference maps which would correspond with acceptable locations for the H atoms bonded to water oxygen O5, the refinements were completed with no allowance for these water H atoms in the models.

CCDC 2257410–2257415 contain the supplementary crystallographic data for this paper. These data can be obtained free of charge via [www.ccdc.cam.ac.uk/data\\_request/cif](http://www.ccdc.cam.ac.uk/data_request/cif), or by emailing

data\_request@ccdc.cam.ac.uk, or by contacting The Cambridge Crystallographic Data Centre, 12 Union Road, Cambridge CB2 1EZ, UK; fax: +44 1223 336033.

## 2. Synthesis

### Preparation of 4-(*o*-nitrobenzyl)imino-1,2,4-triazole (*o*-NTrz)

The ligands were synthesized according to the reported literature procedures.<sup>3</sup>

### Preparation of [Fe<sup>II</sup>(*o*-NTrz)<sub>2</sub>Pt<sup>II</sup>(CN)<sub>4</sub>]·H<sub>2</sub>O (**1**·H<sub>2</sub>O)

An aqueous solution (5.0 mL) of FeSO<sub>4</sub>·7H<sub>2</sub>O (14.0 mg, 0.05 mmol) and ascorbic acid (5.0 mg) was placed at the bottom of the test tube (inner diameter 1.2 cm, length 14.4 cm) and a mixture of methanol and water (v/v = 2:1, 4 mL) was added as a buffer solvent followed by freshly prepared methanol solution (5.0 mL) *o*-NTrz (21.7 mg, 0.1 mmol) and K<sub>2</sub>[Pt(CN)<sub>4</sub>]·3H<sub>2</sub>O (5.0 mg, 0.01 mmol) into layers. The tubes were sealed and left to stand in an undisturbed environment and brown flaky crystals were collected after 3 weeks. Yield: ~30% based on K<sub>2</sub>[Pt(CN)<sub>4</sub>]. Elemental analyses (%) calcd for C<sub>22</sub>H<sub>16</sub>FeN<sub>14</sub>O<sub>5</sub>Pt (**1**·H<sub>2</sub>O): C, 32.73; H, 2.00; N, 24.29. Found: C, 32.69; H, 2.00; N, 23.63. IR (KBr pellet, cm<sup>-1</sup>): 3627 (w), 3141 (w), 3092 (w), 2359 (w), 2173 (s), 1523 (s), 1352 (m), 1215 (w), 1166 (w), 1050 (s), 952 (w), 846 (w), 664 (m), 609 (m), 423 (w).

### Preparation of [Fe<sup>II</sup>(*o*-NTrz)<sub>2</sub>Pt<sup>II</sup>(CN)<sub>4</sub>] (**1**)

The brown flake crystals **1**·H<sub>2</sub>O were heated under vacuum at 373 K for more than 12 h to obtain dehydrated samples **1**. Elemental analyses (%) calcd for C<sub>22</sub>H<sub>14</sub>FeN<sub>14</sub>O<sub>4</sub>Pt (**1**): C, 33.48; H, 1.79; N, 24.84. Found: C, 33.51; H, 1.82; N, 24.89. IR (KBr pellet, cm<sup>-1</sup>): 3626 (w), 3145 (w), 3087 (w), 2357 (m), 2174 (m), 1523 (m), 1356 (m), 1211 (w), 1161 (w), 1053 (m), 954 (w), 855 (w), 672 (w), 609 (w), 456 (w).

### 3. Additional Tables

Table S1. Crystal structure and refinement details for compound **1·H<sub>2</sub>O** at 280, 240, 150 K.

| <i>T</i> / K                                         | <b>1·H<sub>2</sub>O</b>                                             |                                                                     |                                                                     |
|------------------------------------------------------|---------------------------------------------------------------------|---------------------------------------------------------------------|---------------------------------------------------------------------|
|                                                      | 280                                                                 | 240                                                                 | 150                                                                 |
| Empirical formula                                    | C <sub>22</sub> H <sub>16</sub> FeN <sub>14</sub> O <sub>5</sub> Pt | C <sub>22</sub> H <sub>16</sub> FeN <sub>14</sub> O <sub>5</sub> Pt | C <sub>22</sub> H <sub>16</sub> FeN <sub>14</sub> O <sub>5</sub> Pt |
| Molecular weight                                     | 807.43                                                              | 807.43                                                              | 807.43                                                              |
| Crystal system                                       | monoclinic                                                          | monoclinic                                                          | monoclinic                                                          |
| Space group                                          | <i>C2/m</i>                                                         | <i>C2/m</i>                                                         | <i>C2/m</i>                                                         |
| <i>a</i> /Å                                          | 26.6222(8)                                                          | 26.2662(9)                                                          | 26.1950(7)                                                          |
| <i>b</i> /Å                                          | 7.2969(2)                                                           | 7.1043(3)                                                           | 6.9648(2)                                                           |
| <i>c</i> /Å                                          | 15.1034(4)                                                          | 14.8621(5)                                                          | 14.6878(4)                                                          |
| <i>α</i> /°                                          | 90                                                                  | 90                                                                  | 90                                                                  |
| <i>β</i> /°                                          | 100.271(3)                                                          | 100.454(3)                                                          | 100.680(2)                                                          |
| <i>γ</i> /°                                          | 90                                                                  | 90                                                                  | 90                                                                  |
| Volume/Å <sup>3</sup>                                | 2886.96(14)                                                         | 2727.28(18)                                                         | 2633.27(13)                                                         |
| <i>Z</i>                                             | 4                                                                   | 4                                                                   | 4                                                                   |
| $\rho_{\text{calc}}$ /g/cm <sup>3</sup>              | 1.858                                                               | 1.966                                                               | 2.037                                                               |
| $\mu$ /mm <sup>-1</sup>                              | 5.402                                                               | 5.719                                                               | 5.923                                                               |
| F(000)                                               | 1560.0                                                              | 1560.0                                                              | 1560.0                                                              |
| Goodness-of-fit on <i>F</i> <sup>2</sup>             | 1.059                                                               | 1.087                                                               | 1.066                                                               |
| Final <i>R</i> indexes [ <i>I</i> >= 2σ( <i>I</i> )] | <i>R</i> <sub>1</sub> = 0.0240,<br><i>wR</i> <sub>2</sub> = 0.0612  | <i>R</i> <sub>1</sub> = 0.0302,<br><i>wR</i> <sub>2</sub> = 0.0701  | <i>R</i> <sub>1</sub> = 0.0432,<br><i>wR</i> <sub>2</sub> = 0.1112  |
| Final <i>R</i> indexes [all data]                    | <i>R</i> <sub>1</sub> = 0.0309,<br><i>wR</i> <sub>2</sub> = 0.0642  | <i>R</i> <sub>1</sub> = 0.0364,<br><i>wR</i> <sub>2</sub> = 0.07256 | <i>R</i> <sub>1</sub> = 0.0524,<br><i>wR</i> <sub>2</sub> = 0.1170  |
| CCDC no.                                             | 2257412                                                             | 2257411                                                             | 2257410                                                             |

$$R_1 = \sum |F_o| - |F_c| / \sum |F_o|, wR_2 = [\sum w(F_o^2 - F_c^2)^2 / \sum w(F_o^2)^2]^{1/2}$$

Table S2. Crystal structure and refinement details for compound **1** at 293, 250, 180 K.

| <b>1</b>                                             |                                                                     |                                                                     |                                                                     |
|------------------------------------------------------|---------------------------------------------------------------------|---------------------------------------------------------------------|---------------------------------------------------------------------|
| <i>T</i> / K                                         | 293                                                                 | 250                                                                 | 180                                                                 |
| Empirical formula                                    | C <sub>22</sub> H <sub>14</sub> FeN <sub>14</sub> O <sub>4</sub> Pt | C <sub>22</sub> H <sub>14</sub> FeN <sub>14</sub> O <sub>4</sub> Pt | C <sub>22</sub> H <sub>14</sub> FeN <sub>14</sub> O <sub>4</sub> Pt |
| Molecular weight                                     | 789.41                                                              | 789.41                                                              | 789.41                                                              |
| Crystal system                                       | monoclinic                                                          | monoclinic                                                          | monoclinic                                                          |
| Space group                                          | <i>C2/m</i>                                                         | <i>C2/m</i>                                                         | <i>C2/m</i>                                                         |
| <i>a</i> /Å                                          | 26.4601(9)                                                          | 26.2968(16)                                                         | 26.0552(11)                                                         |
| <i>b</i> /Å                                          | 7.2922(3)                                                           | 7.2061(4)                                                           | 7.0129(2)                                                           |
| <i>c</i> /Å                                          | 15.0392(6)                                                          | 14.9288(9)                                                          | 14.6062(5)                                                          |
| <i>α</i> /°                                          | 90                                                                  | 90                                                                  | 90                                                                  |
| <i>β</i> /°                                          | 98.267(4)                                                           | 98.444(6)                                                           | 99.248(4)                                                           |
| <i>γ</i> /°                                          | 90                                                                  | 90                                                                  | 90                                                                  |
| Volume/Å <sup>3</sup>                                | 2871.69(19)                                                         | 2798.3(3)                                                           | 2634.19(16)                                                         |
| <i>Z</i>                                             | 4                                                                   | 4                                                                   | 4                                                                   |
| $\rho_{\text{calc}}$ /cm <sup>3</sup>                | 1.826                                                               | 1.874                                                               | 1.991                                                               |
| $\mu$ /mm <sup>-1</sup>                              | 5.426                                                               | 5.569                                                               | 5.915                                                               |
| F(000)                                               | 1520.0                                                              | 1520.0                                                              | 1520.0                                                              |
| Goodness-of-fit on <i>F</i> <sup>2</sup>             | 0.968                                                               | 1.076                                                               | 1.062                                                               |
| Final <i>R</i> indexes [ <i>I</i> ≥ 2σ ( <i>I</i> )] | <i>R</i> <sub>1</sub> = 0.0316,<br><i>wR</i> <sub>2</sub> = 0.0813  | <i>R</i> <sub>1</sub> = 0.0352,<br><i>wR</i> <sub>2</sub> = 0.0916  | <i>R</i> <sub>1</sub> = 0.0358,<br><i>wR</i> <sub>2</sub> = 0.0920  |
| Final <i>R</i> indexes [all data]                    | <i>R</i> <sub>1</sub> = 0.0441,<br><i>wR</i> <sub>2</sub> = 0.0922  | <i>R</i> <sub>1</sub> = 0.0446,<br><i>wR</i> <sub>2</sub> = 0.0989  | <i>R</i> <sub>1</sub> = 0.0452,<br><i>wR</i> <sub>2</sub> = 0.1017  |
| CCDC no.                                             | 2257415                                                             | 2257414                                                             | 2257413                                                             |

$$R_1 = \frac{\sum ||F_o| - |F_c||}{\sum |F_o|}, wR_2 = \frac{[\sum w(F_o^2 - F_c^2)^2]}{\sum w(F_o^2)^2}]^{1/2}$$

**Table S3.** The Fe–N bond lengths in compounds **1**·H<sub>2</sub>O and **1** at different temperatures.

| <i>T</i> / K             | <b>1</b> ·H <sub>2</sub> O |          |           | <b>1</b> |          |          |
|--------------------------|----------------------------|----------|-----------|----------|----------|----------|
|                          | 280                        | 240      | 150       | 293      | 250      | 180      |
| Fe1–N1 (Å)               | 2.134(3)                   | 1.934(3) | 1.929(5)  | 2.131(5) | 2.027(5) | 1.930(5) |
| Fe1–N2 (Å)               | 2.182(3)                   | 1.971(4) | 1.964(6)  | 2.189(6) | 2.076(8) | 1.957(7) |
| Fe2–N7 (Å)               | 2.127(3)                   | 2.112(3) | 1.927(5)  | 2.129(5) | 2.110(5) | 1.928(5) |
| Fe2–N8 (Å)               | 2.221(4)                   | 2.197(5) | 1.987(6)  | 2.209(6) | 2.172(8) | 1.980(7) |
| Fe1–N <sub>ave</sub> (Å) | 2.158(3)                   | 1.953(4) | 1.947(6)  | 2.160(6) | 2.052(1) | 1.944(1) |
| Fe2–N <sub>ave</sub> (Å) | 2.174(4)                   | 2.155(4) | 1.957(6)  | 2.169(5) | 2.141(6) | 1.954(6) |
| Fe1–N≡C<br>(°)           | 177.1(3)                   | 178.7(3) | 176.7(54) | 172.1(3) | 174.2(6) | 176.6(9) |
| Fe2–N≡C<br>(°)           | 170.1(3)                   | 170.0(3) | 172.1(4)  | 169.5(6) | 169.6(0) | 173.0(8) |

**Table S4.** The  $\pi\cdots\pi$ , hydrogen-bonding interaction distances and Fe $\cdots$ Fe distances for **1**·H<sub>2</sub>O and **1**.

| <i>T</i> / K                       | <b>1</b> ·H <sub>2</sub> O |                       |                       | <b>1</b>              |                       |                       |
|------------------------------------|----------------------------|-----------------------|-----------------------|-----------------------|-----------------------|-----------------------|
|                                    | 280                        | 240                   | 150                   | 293                   | 250                   | 180                   |
| $\pi\cdots\pi$ interactions<br>(Å) | 3.783(1)/<br>3.927(1)      | 3.760(1)/<br>3.818(1) | 3.676(1)/<br>3.861(1) | 3.774(9)/<br>3.899(0) | 3.785(4)/<br>3.840(0) | 3.703(9)/<br>3.813(4) |
| O5–N3 (Å)                          | 2.910(6)                   | 2.842(8)              | 2.78 5(9)             |                       |                       |                       |
| d1 (Å)                             | 7.297(2)                   | 7.104(3)              | 6.965(2)              | 7.292(2)              | 7.206(1)              | 7.012(9)              |
| d2 (Å)                             | 7.552(2)                   | 7.431(3)              | 7.344(2)              | 7.519(6)              | 7.464(4)              | 7.303(1)              |

## 4. Additional Figures

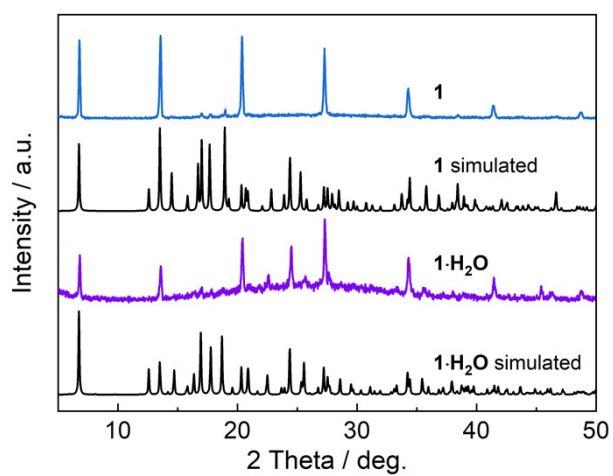

**Fig. S1** PXRD patterns of compounds **1·H<sub>2</sub>O** and **1**.

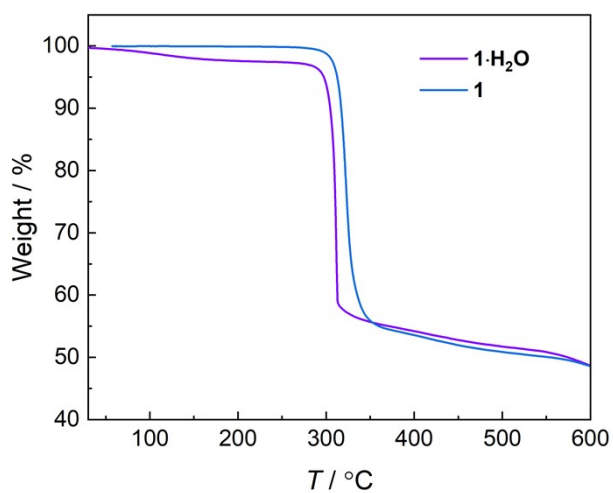

**Fig. S2** TGA curves of **1·H<sub>2</sub>O** and **1**. The variation of guest water molecules was supported by the TGA measurements. The mass loss of around 2.42 % for **1·H<sub>2</sub>O** is proximal to the calculated value of 2.24 % for a single water molecule. In contrast, no significant weight reduction was observed in the crystal of **1**.



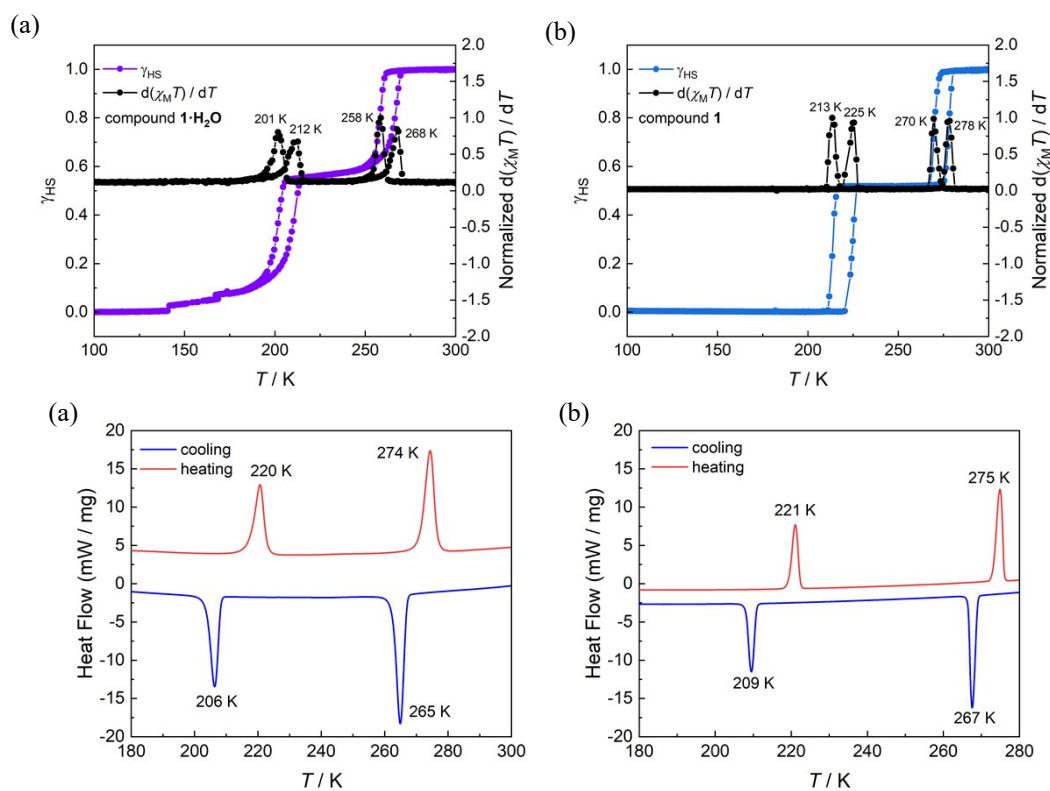

**Fig. S3** HS fraction ( $\gamma_{HS}$ ) and normalized  $\partial(\chi_M T)$  versus  $T$  plots of  $1 \cdot H_2O$  (a) and **1** (b).

**Fig. S4** DSC curves of  $1 \cdot H_2O$  (a) and **1** (b) upon cooling and warming.

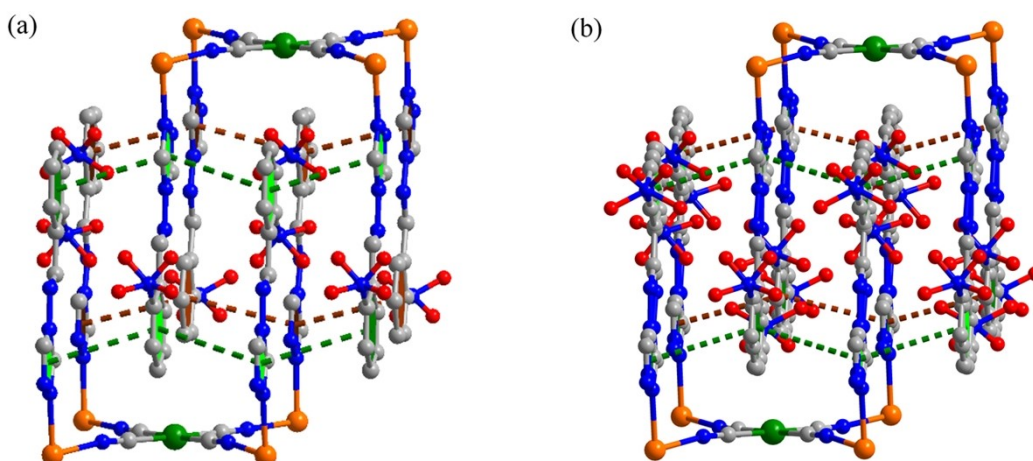

**Fig. S5** Adjacent layers showing interlayer ligand  $\pi \cdots \pi$  interactions for  $1 \cdot \text{H}_2\text{O}$  (a) and **1** (b). The interlayer  $\pi \cdots \pi$  interactions in SCO compounds stabilize the structure, allowing the large rearrangement of the structure in response to the dehydration of the crystals.

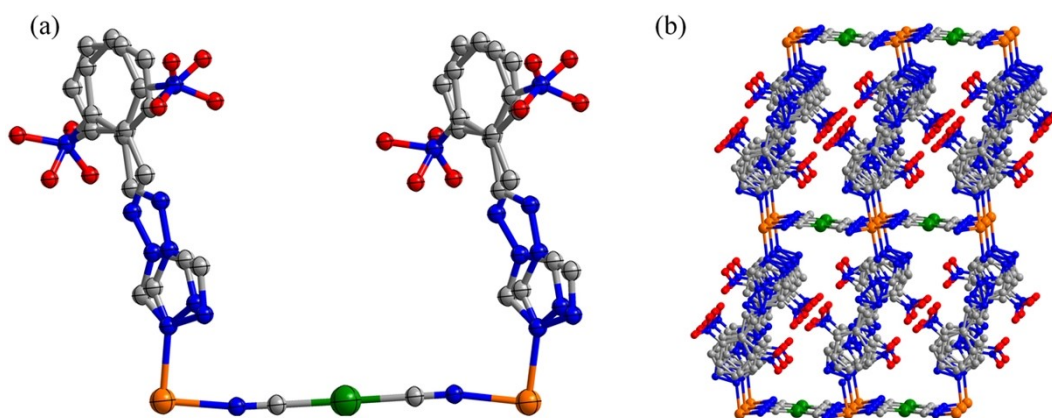

**Fig. S6** (a) The asymmetric unit of compound **1** at 293 K. (b) 3D Stacked Layers. Hydrogen atoms are omitted for clarity.

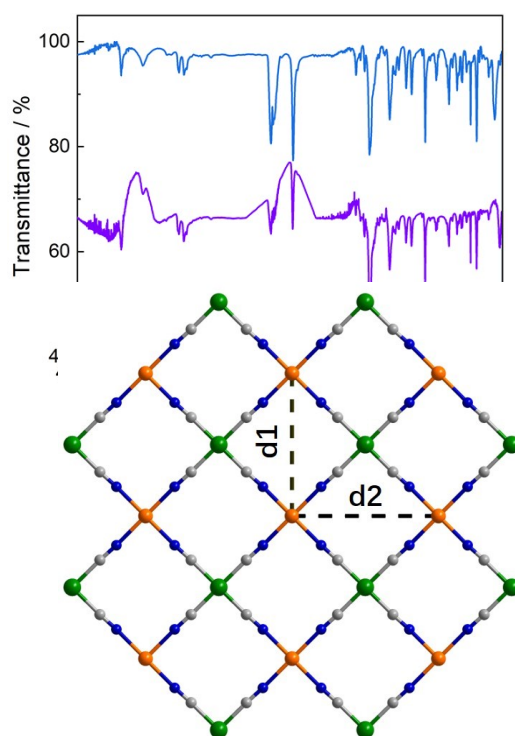

**Fig. S7** FT-IR spectra of  $1 \cdot \text{H}_2\text{O}$  and **1**.

**Fig. S8** The  $\text{Fe} \cdots \text{Fe}$  distances in the 2D  $[\text{FePt}(\text{CN})_4]_n$  layer.

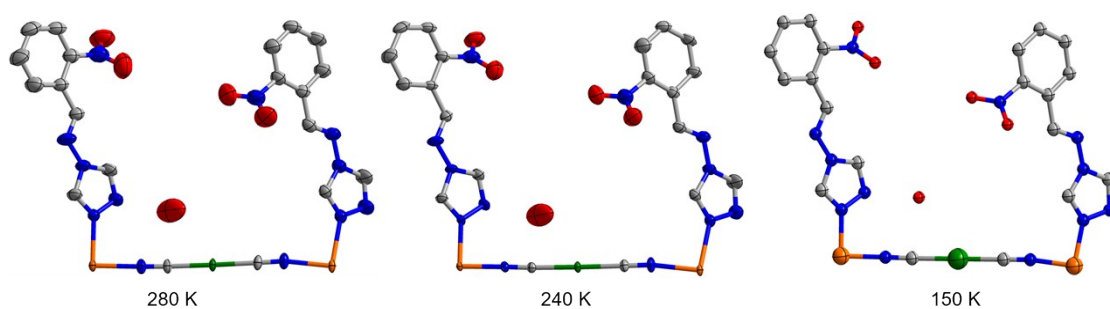

**Fig. S9** The asymmetric unit of compound **1·H<sub>2</sub>O**, showing thermal ellipsoids at 50% probability level. (Hydrogen atoms are omitted for clarity, baby blue is the disordered; C: dark grey; N: blue; Fe: orange; O: red; Pt: green.)

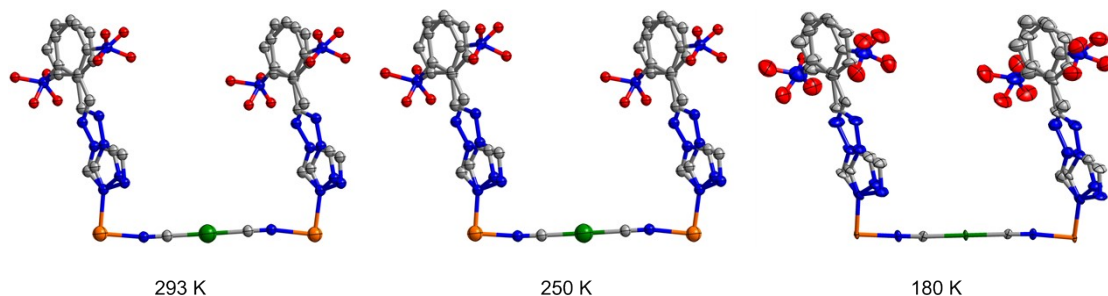

**Fig. S10** The asymmetric unit of compound **1**, showing thermal ellipsoids at 50% probability level. (Hydrogen atoms are omitted for clarity, baby blue is the disordered; C: dark grey; N: blue; Fe: orange; O: red; Pt: green.)

## 5 References

- 1 J. E. Clements, P. R. Airey, F. Ragon, V. Shang, C. J. Kepert and S. M. Neville, *Inorg. Chem.*, 2018, **57**, 14930–14938.
- 2 G. M. Sheldrick, *Acta Cryst. C*, 2015, **71**, 3–8.
- 3 O. V. Dolomanov, L. J. Bourhis, R. J. Gildea, J. A. K. Howard and H. Puschmann, *J. Appl. Crystallogr.*, 2009, **42**, 339–341.
